# Supplementary material for: A shift away from mutualism under food-deprived conditions in an anemone-dinoflagellate association
Source: PeerJ. 2020 Oct 28;8:e9745. doi: 10.7717/peerj.9745 (PMC7602683; doi:10.7717/peerj.9745)
Supplement: Data S1 [file peerj-08-9745-s001.xlsx]

## Sheet: Fig. 2B
treatment	inoculation status	feeding status	pedal disk area-1 week	area-2-weeks	area-3-weeks	area-4-weeks	area-5-weeks	area-6-weeks	area-7-weeks	area-8 weeks
Aposymbiotic-fed	aposymbiotic	fed	0.461	0.631	0.947	1.336	1.518	1.945	3.424	4.571
Aposymbiotic-fed	aposymbiotic	fed	0.674	0.788	0.799	1.494	1.212	0.999	2.374	1.823
Aposymbiotic-fed	aposymbiotic	fed	0.831	0.721	1.002	1.308	1.778	0.816	1.828	2.405
Aposymbiotic-fed	aposymbiotic	fed	0.356	0.343	0.479	0.862	1.516	1.067	1.651	1.951
Aposymbiotic-fed	aposymbiotic	fed	0.438	0.405	0.73	1.424	2.283	1.917	1.925	2.498
Aposymbiotic-fed	aposymbiotic	fed	0.578	0.467	0.837	0.254	0.344	0.317	0.398	0.367
Aposymbiotic-fed	aposymbiotic	fed	0.522	0.541	0.746	1.343	2.028	4.647	4.965
Aposymbiotic-fed	aposymbiotic	fed	0.424	0.405	0.642	1.263	2.6	2.009	4.217	5.274
Aposymbiotic-fed	aposymbiotic	fed	0.313	0.407	0.645	1.695	1.962	3.798	3.797	5.787
Aposymbiotic-fed	aposymbiotic	fed	0.292	0.229	0.374	0.342	0.719	1.72	2.346	3.851
Aposymbiotic-fed	aposymbiotic	fed	0.583	0.61	1.051	1.587	2.679	3.877	4.073	4.841
Aposymbiotic-fed	aposymbiotic	fed	0.388	0.572	0.621	0.873	0.805	1.962	2.866	3.876
Inoculated-fed	inoculated	fed	0.633	0.742	1.18	2.111	1.132	3.497	3.645	4.963
Inoculated-fed	inoculated	fed	0.29	0.587	poor image quality	0.682	0.855	1.524	1.874	1.959
Inoculated-fed	inoculated	fed	0.492	0.624	0.954	1.052	1.382	2.179	3.535	4.754
Inoculated-fed	inoculated	fed	0.531	0.514	1.082	1.342		1.661	1.991	2.638
Inoculated-fed	inoculated	fed	0.488	0.496	0.786	0.969	2.227	0.918	2.025	2.367
Inoculated-fed	inoculated	fed	0.391	0.578	0.703	1.284	1.199	0.965	1.755	1.621
Inoculated-fed	inoculated	fed	0.368	0.659
Inoculated-fed	inoculated	fed	0.378	0.538	0.506	0.871	1.839	4.245	7.124	3.319
Inoculated-fed	inoculated	fed	0.373	0.601	0.624	1.555	2.174	5.433	6.65	9.452
Inoculated-fed	inoculated	fed	poor image quality	0.875	0.999	1.623	3.561	2.259	5.374	6.046
Inoculated-fed	inoculated	fed	0.265	0.365	0.474	0.966	1.13	1.282	3.016	3.973
Inoculated-fed	inoculated	fed	0.388	0.519	1.263	1.623		4.326	5.654	8.979
Aposymbiotic-starved	aposymbiotic	starved	0.985	0.555	0.608	0.364	0.541	0.368	0.293	0.367
Aposymbiotic-starved	aposymbiotic	starved	0.596	0.484	0.367	0.295	0.364	0.453	0.483	0.256
Aposymbiotic-starved	aposymbiotic	starved	0.577	0.455	0.349	0.315	0.31	0.323	0.276	0.266
Aposymbiotic-starved	aposymbiotic	starved	0.424	0.326	0.492	0.204	0.273	0.308	0.255	0.209
Aposymbiotic-starved	aposymbiotic	starved	0.39	0.305	0.283	0.262	0.323	0.244	0.189	0.3
Aposymbiotic-starved	aposymbiotic	starved	0.502	0.389	0.729	0.186	0.267	0.242	0.204	0.237
Aposymbiotic-starved	aposymbiotic	starved	0.7	0.413	0.42	0.296	0.378	0.336	0.346	0.344
Aposymbiotic-starved	aposymbiotic	starved	0.597	0.511	0.255	0.357	0.382	0.336	0.354	0.328
Aposymbiotic-starved	aposymbiotic	starved	0.611	0.51	0.305	0.287	0.294	0.264	0.259	0.198
Aposymbiotic-starved	aposymbiotic	starved	0.705	0.318	0.401	0.299	0.309	0.334	0.327	0.281
Aposymbiotic-starved	aposymbiotic	starved	0.48	0.439	0.426	0.313	0.412	0.267	0.34	0.326
Aposymbiotic-starved	aposymbiotic	starved	0.957	0.518	0.371	0.385	0.316	0.32	0.307	0.457
Inoculated-starved	inoculated	starved	0.212	0.284	0.313	0.152
Inoculated-starved	inoculated	starved	0.409	0.284	0.367	0.164	0.157	0.213	0.316	0.214
Inoculated-starved	inoculated	starved	0.433	0.486	0.349	0.264	0.37	0.452	0.187	0.161
Inoculated-starved	inoculated	starved	0.465	0.621	0.492	0.725	0.625	0.398	0.198	0.098
Inoculated-starved	inoculated	starved	0.587	0.405	0.283	0.342	0.342	0.432	0.491	0.39
Inoculated-starved	inoculated	starved	0.563	0.491	0.729	0.731	0.551	0.281
Inoculated-starved	inoculated	starved	0.412	0.438	0.42	0.708	0.434	0.431	0.276	0.287
Inoculated-starved	inoculated	starved	0.306	0.313	0.255	0.375	0.35	0.362	0.252	0.203
Inoculated-starved	inoculated	starved	poor image quality	0.293	0.305	0.274	0.423	0.342	0.461	0.154
Inoculated-starved	inoculated	starved	0.28	0.401	0.401	0.345	0.422	0.118
Inoculated-starved	inoculated	starved	0.638	0.487	0.426	0.322	0.418	0.396	0.373	0.414
Inoculated-starved	inoculated	starved	0.44	0.424	0.371	0.586	0.554	0.425	0.34	0.355

## Sheet: Table 1
treatment	infection status	fed status	week	tissue ball or mortality data	formed tissue ball?	died?	freq
inoculated-starved (ISA)	inoculated	starved	1	tissue ball	Yes		0
inoculated-fed (IFA)	inoculated	fed	1	tissue ball	Yes		0
aposymbiotic-starved (ASA)	aposymbiotic	starved	1	tissue ball	Yes		0
aposymbiotic-fed (AFA)	aposymbiotic	fed	1	tissue ball	Yes		0
inoculated-starved (ISA)	inoculated	starved	1	tissue ball	No		12
inoculated-fed (IFA)	inoculated	fed	1	tissue ball	No		12
aposymbiotic-starved (ASA)	aposymbiotic	starved	1	tissue ball	No		12
aposymbiotic-fed (AFA)	aposymbiotic	fed	1	tissue ball	No		12
inoculated-starved (ISA)	inoculated	starved	2	tissue ball	Yes		0
inoculated-fed (IFA)	inoculated	fed	2	tissue ball	Yes		0
aposymbiotic-starved (ASA)	aposymbiotic	starved	2	tissue ball	Yes		0
aposymbiotic-fed (AFA)	aposymbiotic	fed	2	tissue ball	Yes		0
inoculated-starved (ISA)	inoculated	starved	2	tissue ball	No		12
inoculated-fed (IFA)	inoculated	fed	2	tissue ball	No		12
aposymbiotic-starved (ASA)	aposymbiotic	starved	2	tissue ball	No		12
aposymbiotic-fed (AFA)	aposymbiotic	fed	2	tissue ball	No		12
inoculated-starved (ISA)	inoculated	starved	3	tissue ball	Yes		0
inoculated-fed (IFA)	inoculated	fed	3	tissue ball	Yes		0
aposymbiotic-starved (ASA)	aposymbiotic	starved	3	tissue ball	Yes		0
aposymbiotic-fed (AFA)	aposymbiotic	fed	3	tissue ball	Yes		0
inoculated-starved (ISA)	inoculated	starved	3	tissue ball	No		12
inoculated-fed (IFA)	inoculated	fed	3	tissue ball	No		12
aposymbiotic-starved (ASA)	aposymbiotic	starved	3	tissue ball	No		12
aposymbiotic-fed (AFA)	aposymbiotic	fed	3	tissue ball	No		12
inoculated-starved (ISA)	inoculated	starved	4	tissue ball	Yes		1
inoculated-fed (IFA)	inoculated	fed	4	tissue ball	Yes		0
aposymbiotic-starved (ASA)	aposymbiotic	starved	4	tissue ball	Yes		0
aposymbiotic-fed (AFA)	aposymbiotic	fed	4	tissue ball	Yes		0
inoculated-starved (ISA)	inoculated	starved	4	tissue ball	No		11
inoculated-fed (IFA)	inoculated	fed	4	tissue ball	No		12
aposymbiotic-starved (ASA)	aposymbiotic	starved	4	tissue ball	No		12
aposymbiotic-fed (AFA)	aposymbiotic	fed	4	tissue ball	No		12
inoculated-starved (ISA)	inoculated	starved	5	tissue ball	Yes		6
inoculated-fed (IFA)	inoculated	fed	5	tissue ball	Yes		0
aposymbiotic-starved (ASA)	aposymbiotic	starved	5	tissue ball	Yes		0
aposymbiotic-fed (AFA)	aposymbiotic	fed	5	tissue ball	Yes		0
inoculated-starved (ISA)	inoculated	starved	5	tissue ball	No		6
inoculated-fed (IFA)	inoculated	fed	5	tissue ball	No		12
aposymbiotic-starved (ASA)	aposymbiotic	starved	5	tissue ball	No		12
aposymbiotic-fed (AFA)	aposymbiotic	fed	5	tissue ball	No		12
inoculated-starved (ISA)	inoculated	starved	6	tissue ball	Yes		8
inoculated-fed (IFA)	inoculated	fed	6	tissue ball	Yes		0
aposymbiotic-starved (ASA)	aposymbiotic	starved	6	tissue ball	Yes		0
aposymbiotic-fed (AFA)	aposymbiotic	fed	6	tissue ball	Yes		0
inoculated-starved (ISA)	inoculated	starved	6	tissue ball	No		4
inoculated-fed (IFA)	inoculated	fed	6	tissue ball	No		12
aposymbiotic-starved (ASA)	aposymbiotic	starved	6	tissue ball	No		12
aposymbiotic-fed (AFA)	aposymbiotic	fed	6	tissue ball	No		12
inoculated-starved (ISA)	inoculated	starved	7	tissue ball	Yes		11
inoculated-fed (IFA)	inoculated	fed	7	tissue ball	Yes		0
aposymbiotic-starved (ASA)	aposymbiotic	starved	7	tissue ball	Yes		0
aposymbiotic-fed (AFA)	aposymbiotic	fed	7	tissue ball	Yes		0
inoculated-starved (ISA)	inoculated	starved	7	tissue ball	No		1
inoculated-fed (IFA)	inoculated	fed	7	tissue ball	No		12
aposymbiotic-starved (ASA)	aposymbiotic	starved	7	tissue ball	No		12
aposymbiotic-fed (AFA)	aposymbiotic	fed	7	tissue ball	No		12
inoculated-starved (ISA)	inoculated	starved	8	tissue ball	Yes		12
inoculated-fed (IFA)	inoculated	fed	8	tissue ball	Yes		0
aposymbiotic-starved (ASA)	aposymbiotic	starved	8	tissue ball	Yes		0
aposymbiotic-fed (AFA)	aposymbiotic	fed	8	tissue ball	Yes		0
inoculated-starved (ISA)	inoculated	starved	8	tissue ball	No		0
inoculated-fed (IFA)	inoculated	fed	8	tissue ball	No		12
aposymbiotic-starved (ASA)	aposymbiotic	starved	8	tissue ball	No		12
aposymbiotic-fed (AFA)	aposymbiotic	fed	8	tissue ball	No		12
inoculated-starved (ISA)	inoculated	starved	1	mortality		Yes	0
inoculated-fed (IFA)	inoculated	fed	1	mortality		Yes	0
aposymbiotic-starved (ASA)	aposymbiotic	starved	1	mortality		Yes	0
aposymbiotic-fed (AFA)	aposymbiotic	fed	1	mortality		Yes	0
inoculated-starved (ISA)	inoculated	starved	1	mortality		No	12
inoculated-fed (IFA)	inoculated	fed	1	mortality		No	12
aposymbiotic-starved (ASA)	aposymbiotic	starved	1	mortality		No	12
aposymbiotic-fed (AFA)	aposymbiotic	fed	1	mortality		No	12
inoculated-starved (ISA)	inoculated	starved	2	mortality		Yes	0
inoculated-fed (IFA)	inoculated	fed	2	mortality		Yes	0
aposymbiotic-starved (ASA)	aposymbiotic	starved	2	mortality		Yes	0
aposymbiotic-fed (AFA)	aposymbiotic	fed	2	mortality		Yes	0
inoculated-starved (ISA)	inoculated	starved	2	mortality		No	12
inoculated-fed (IFA)	inoculated	fed	2	mortality		No	12
aposymbiotic-starved (ASA)	aposymbiotic	starved	2	mortality		No	12
aposymbiotic-fed (AFA)	aposymbiotic	fed	2	mortality		No	12
inoculated-starved (ISA)	inoculated	starved	3	mortality		Yes	0
inoculated-fed (IFA)	inoculated	fed	3	mortality		Yes	0
aposymbiotic-starved (ASA)	aposymbiotic	starved	3	mortality		Yes	0
aposymbiotic-fed (AFA)	aposymbiotic	fed	3	mortality		Yes	0
inoculated-starved (ISA)	inoculated	starved	3	mortality		No	12
inoculated-fed (IFA)	inoculated	fed	3	mortality		No	12
aposymbiotic-starved (ASA)	aposymbiotic	starved	3	mortality		No	12
aposymbiotic-fed (AFA)	aposymbiotic	fed	3	mortality		No	12
inoculated-starved (ISA)	inoculated	starved	4	mortality		Yes	0
inoculated-fed (IFA)	inoculated	fed	4	mortality		Yes	1
aposymbiotic-starved (ASA)	aposymbiotic	starved	4	mortality		Yes	0
aposymbiotic-fed (AFA)	aposymbiotic	fed	4	mortality		Yes	0
inoculated-starved (ISA)	inoculated	starved	4	mortality		No	12
inoculated-fed (IFA)	inoculated	fed	4	mortality		No	11
aposymbiotic-starved (ASA)	aposymbiotic	starved	4	mortality		No	12
aposymbiotic-fed (AFA)	aposymbiotic	fed	4	mortality		No	12
inoculated-starved (ISA)	inoculated	starved	5	mortality		Yes	1
inoculated-fed (IFA)	inoculated	fed	5	mortality		Yes	1
aposymbiotic-starved (ASA)	aposymbiotic	starved	5	mortality		Yes	0
aposymbiotic-fed (AFA)	aposymbiotic	fed	5	mortality		Yes	0
inoculated-starved (ISA)	inoculated	starved	5	mortality		No	11
inoculated-fed (IFA)	inoculated	fed	5	mortality		No	11
aposymbiotic-starved (ASA)	aposymbiotic	starved	5	mortality		No	12
aposymbiotic-fed (AFA)	aposymbiotic	fed	5	mortality		No	12
inoculated-starved (ISA)	inoculated	starved	6	mortality		Yes	1
inoculated-fed (IFA)	inoculated	fed	6	mortality		Yes	1
aposymbiotic-starved (ASA)	aposymbiotic	starved	6	mortality		Yes	0
aposymbiotic-fed (AFA)	aposymbiotic	fed	6	mortality		Yes	0
inoculated-starved (ISA)	inoculated	starved	6	mortality		No	11
inoculated-fed (IFA)	inoculated	fed	6	mortality		No	11
aposymbiotic-starved (ASA)	aposymbiotic	starved	6	mortality		No	12
aposymbiotic-fed (AFA)	aposymbiotic	fed	6	mortality		No	12
inoculated-starved (ISA)	inoculated	starved	7	mortality		Yes	3
inoculated-fed (IFA)	inoculated	fed	7	mortality		Yes	1
aposymbiotic-starved (ASA)	aposymbiotic	starved	7	mortality		Yes	0
aposymbiotic-fed (AFA)	aposymbiotic	fed	7	mortality		Yes	0
inoculated-starved (ISA)	inoculated	starved	7	mortality		No	9
inoculated-fed (IFA)	inoculated	fed	7	mortality		No	11
aposymbiotic-starved (ASA)	aposymbiotic	starved	7	mortality		No	12
aposymbiotic-fed (AFA)	aposymbiotic	fed	7	mortality		No	12
inoculated-starved (ISA)	inoculated	starved	8	mortality		Yes	3
inoculated-fed (IFA)	inoculated	fed	8	mortality		Yes	1
aposymbiotic-starved (ASA)	aposymbiotic	starved	8	mortality		Yes	0
aposymbiotic-fed (AFA)	aposymbiotic	fed	8	mortality		Yes	0
inoculated-starved (ISA)	inoculated	starved	8	mortality		No	9
inoculated-fed (IFA)	inoculated	fed	8	mortality		No	11
aposymbiotic-starved (ASA)	aposymbiotic	starved	8	mortality		No	12
aposymbiotic-fed (AFA)	aposymbiotic	fed	8	mortality		No	12

## Sheet: Fig. S1
The raw data of Fig S1a: Dinoflagellate cell count (cells anemone-1)
		1hr	1w	2w	4w	6w	8w
ISA	#1	173.12	2441.26	10792.8	1548.76(TB)	-	-
	#2	116.04	3585.2	10182.2	9314.96	3903.15(TB)	847.31(TB)
	#3	111.38	2869.34	9472.16	8631.16	2567.23(TB)	-
	#4	63.15	1278.41	5267.33	10155.3	3974.78	2946.01(TB)
	#5	169.75	4310.2	12371.6	6925.52	2615.72(TB)	-
	Mean	126.69 ± 45.8	2896.88 ± 1151	9617.24 ± 2657	7315.15 ± 3435	3265.22 ± 779	1896.66 ± 1484
IFA	#1	387.56	5287.76	13926.1	35024.5	65777.1	110471
	#2	47.23	1390.86	9749.36	14488.4	39197	68424.7
	#3	134.57	2585.91	12092	18530.8	91480.4	56110.3
	#4	255.66	4066.66	9715.78	21717.1	19344.8	28571
	#5	398.86	2236.36	7951.94	15131.2	21974.3	26046.8
	Mean	244.78 ± 154.4	3113.51 ± 1553	10687.02 ± 2333	20978.42 ± 8369	47554.71 ± 30747	57924.79 ± 34469
ISA: Inoculated starved anemone; IFA: Inoculated fed anemone.
The raw data of Fig S1b: Dinoflagellate cell density (cells mm-2)
		1hr	1w	2w	4w	6w	8w
ISA	#1	0.35	6.47	22.51	20.81 (TB)	-	-
	#2	0.15	5.69	22.14	20.3	24.85 (TB)	27.74 (TB)
	#3	0.12	3.63	17.76	21.57	25.24 (TB)	-
	#4	0.08	1.87	8.86	20.59	21.13	25.33 (TB)
	#5	0.15	2.93	16.54	21.82	25.75 (TB)	-
	Mean	0.17 ± 0.1055	4.12 ± 1.918	17.56 ± 5.53	21.02 ± 0.653	24.24 ± 2.11	26.54 ± 1.7
IFA	#1	0.44	10.64	19.47	17.38	26.99	24.09
	#2	0.04	1.7	13.2	10.25	22.1	21.58
	#3	0.15	4.5	18.74	19.33	25.91	21.91
	#4	0.35	8.79	17.14	22.38	23.27	23.14
	#5	0.61	3.95	13.62	21.99	22.79	21.42
	Mean	0.32 ± 0.226	5.92 ± 3.68	16.43 ± 2.89	18.27 ± 4.93	24.21 ± 2.122	22.43 ± 1.151
ISA: inoculated starved anemone; IFA: inoculated fed anemone; TB: tissue ball.
